1

2

3 **Developing a Motherhood regret scale: An examination of reliability, validity, and association**  
4 **with basic attributes**

5 **Short title: Motherhood regret scale**

6

7

8 Ranno Haruyama<sup>1\*</sup>, Koubun Wakashima<sup>1</sup>, Kohei Koiwa<sup>2</sup>

9 <sup>1</sup> Graduate School of Education, Tohoku University, Sendai, Japan

10 <sup>2</sup> Graduate School of Education, Hokkaido University of Education, Hokkaido, Japan

11

12 \* Corresponding author

13 E-mail: [haruyama.ranno.t4@dc.tohoku.ac.jp](mailto:haruyama.ranno.t4@dc.tohoku.ac.jp) (RH)

14

15

## 16 **Abstract**

17 The first objective of this study was to develop a scale that measures the level of regret of becoming a mother among  
18 women at various stages of motherhood (child age ranging from unborn to 29 years old) and examine its reliability and  
19 validity. The second objective was to explore the effects of participants' basic attributes on the regret of becoming a  
20 mother. The study recruited mothers who were pregnant (before birth), mothers of infants (age 0–1), young children  
21 (age 2–6), primary school-aged children (age 7–12), and adolescents and young adults (age 13–29). In all, responses  
22 from 462 participants (458 women, 4 others; mean age = 37.77 [ $SD = 7.03$ ]; age range = 20–59) were analyzed. As a  
23 result, the unidimensional nine-item scale showed an acceptable value for goodness of fit and high reliability ( $\alpha = .96$ ).  
24 In addition, we determined the cut-off score to categorize the regret group. Among the participants in the present study  
25 ( $N = 462$ ), 31 were classified as the regret group, and they represented the scores at the top 7%. Moreover, regarding the  
26 association between the participants' basic attributes and level of regret, we found that “having many children” had a  
27 significant negative effect on the predicted level of regret ( $\beta = -.19, p < .001$ ) while “being a single mother” had a  
28 significant positive effect ( $\beta = .11, p < .05$ ). Based on these results, we discuss the structure of the scale that was  
29 developed and the effect of a mother's attributes on the level of regret to provide insights on the attributes of  
30 respondents classified into the regret group.

31

## 32 **Introduction**

33 The declining birthrate in Japanese society is becoming increasingly worse. The factors contributing to the declining  
34 birthrate are many, including “changes in values toward marriage and giving birth,” “increase in the feeling of

35 responsibility and burden of parenting,” “late marriage, increase in the average age of childbirth, and increase in the  
36 number of unmarried people,” and “financial anxiety related to securing funds to cover child-rearing costs” [1,2]. In  
37 addition, psychological problems surrounding mothers are on the rise, such as mothers in the child-rearing period  
38 becoming more vulnerable to isolation due to the increase in nuclear families brought by the rapid decline in birthrates,  
39 the increase in undesired births, postpartum depression associated with parental anxiety, and maternity neurosis caused  
40 by the responsibility and pressure of child-rearing [3-6]. Against such trends, the feeling of “regret of becoming a  
41 mother” has received more attention in recent years [7].

## 42 **The regret of becoming a mother**

43 The “regret of becoming a mother” is defined as the inner feeling of regretting becoming a mother [7,8]. In general, the  
44 term “regret” is used to indicate the feeling of disappointment over a choice that was not taken at a point in time  
45 between the past and present. In contrast, the “regret of becoming a mother” is different on the point that it is an  
46 emotional response expressed between the past and present, and the real and imagined [7]. Thus, in this study, we  
47 define the “regret of becoming a mother” as the repentant emotional response that emerges between the reality of being  
48 a mother and the imaged reality of not being a mother. In our interpretation, this emotional response is not only  
49 recognized against the past, when the decision to become a mother was made, but potentially also in the present of  
50 being a mother. Moreover, the term “becoming a mother” as we use it in this study refers to the reality of having a child  
51 rather than the process of psychological preparation related to whether the mother herself has or does not have  
52 awareness of being a mother.

53 Donath [7] reports that today, many women around the world live with this regret. In Japan, NHK [9] conducted a  
54 survey with a wide range of mothers in their teens to their 70s; one in three people responded that “there has been a time  
55 when they wished they had never become a mother” and that they were aware of their regrets and were worried, but  
56 they “cannot talk about it (55%),” reflecting a social environment in which mothers cannot attain help. This suggests  
57 that many mothers struggle with emotions that they cannot be open about in the current society and culture but are  
58 striving to adapt to the role as mothers. Moreover, the hidden increase in the number of mothers in such a situation  
59 contributes to the lack of opportunities to share ways to cope with feelings of regret and to the decline in the appeal of  
60 becoming a mother, thus maintaining a vicious cycle that the leads to a low-birthrate society.

61 Therefore, it is necessary to focus on the feeling of “regret of becoming a mother” that is held by many mothers and  
62 devise ways to support them. However, current studies on motherhood regret (hereafter, the field) have been limited to  
63 sociological accounts of the existence and current situation of regretting mothers [8], and no study has addressed  
64 motherhood regret from a clinical psychological perspective for psychological support. Moving forward, it is essential  
65 that a support model be presented on how a regretting mother can psychologically and socially adapt to the role of being  
66 a mother while having such feelings.

## 67 **Factors related to “regret of becoming a mother”**

68 To propose ways to support those experiencing regret of becoming a mother, it is necessary to understand what factors  
69 are related to regret. Factors related to motherhood regret that can be inferred from previous studies include parenting  
70 anxiety and stress. Matsumura et al. [10] report that the lack of time that a mother can spend on herself influences  
71 parenting stress, leading to an increase in the burden of child-rearing. Additionally, Noguchi et al. [11] and Shimizu et

72 al. [12] report that children’s unreasonable behavior accompanied with the sense of not being able to control are  
73 contributing parenting stressors. Conversely, studies reporting on the positive side of the topic at hand have shown that  
74 having multiple people to talk to can reduce parenting anxiety among mothers of young children and that experiencing  
75 growth as a parent and the growth of one’s child are factors that increase the sense of happiness in being a parent  
76 [13,14]. From the above, it is predicted that the attributes of a mother influence the factors associated with motherhood  
77 regret. Thus, it is necessary to examine such relationships broadly.

## 78 **Trends and issues in previous studies**

79 As mentioned above, trends in previous studies dealing with motherhood regret can be understood as those following a  
80 sociological perspective and those following a psychological perspective. In the sociological school of thought, the  
81 interest has been on pointing out the social pressure that inhibits people from expressing the regret of becoming a  
82 mother and pursuing the creation of a society that is tolerant of the diversity of choices related to childbirth and of  
83 mothers who reveal their regrets [7,8]. However, in Japan, only a few psychological studies have approached the issue  
84 at hand from a psychological perspective, and it is not clear what factors are associated with the mothers’ regret. As a  
85 next step, it is important to clarify the factors related to motherhood regret and examine how it is possible for a  
86 regretting mother to adapt socially and psychologically as a mother while having a sense of regret.

87 We identify two problems in the current state of research. First, most of the research on mothers and child-rearing is  
88 skewed toward studies targeting mothers of infants. Second, it is not possible to measure the degree of motherhood  
89 regret because studies have only measured it by a singular method, such as asking “whether a person regrets [the  
90 decision of becoming a mother] or not.” It is expected that a mother’s regret fluctuates along the child’s growth stages

91 and that such fluctuation has continuity. Moreover, it is necessary to measure regret as a matter of degree to examine  
92 the factors associated with motherhood regret. Hence, it would be meaningful to develop a scale that can measure the  
93 level of regret of becoming a mother by means of question items that target mothers at various child-rearing stages from  
94 pregnancy to having adult children.

95 As such, the two objectives of this study are as follows. The first is to develop a scale that measures the level of regret  
96 of becoming a mother among women at various stages of motherhood (child age ranging from unborn to 29 years old)  
97 and examine its reliability and validity. The second is to explore the effects of participants' attributes on the regret of  
98 becoming a mother.

99

## 100 **Methods**

### 101 **Procedures**

102 Data were collected in Japan. The participants were 482 mothers with children of various age groups: before birth,  
103 infant (age 0–1), young children (age 2–6), elementary school age children (age 7–12) and adolescents and young adults  
104 (age 13–29); of these participants, those with missing answers were excluded from the analysis. In regard to mothers of  
105 children aged 15 or older, those who had a score of five or less on the level of memory recollection of the child-rearing  
106 period were excluded, and participants with invalid responses to the manipulation check item [15] were excluded as  
107 well. Thus, excluding 20 responses in all, responses from 462 participants (458 women and 4 others) were analyzed.  
108 The mean age of the participants included in the analysis was 37.77 ( $SD = 7.03$ ,  $Range = 20–59$ ). Participants were  
109 recruited using an online service provided by a major Japanese crowd sourcing service administered by Yahoo Japan

110 Corporation (<https://crowdsourcing.yahoo.co.jp/>). This online service matches crowdsourcing workers to requests from  
111 clients. For the present study, we posted a Google Forms questionnaire for the purpose of psychological research in the  
112 “survey” category of the online forum. The collection of responses was terminated when the number of respondents  
113 reached 130 at each applicable time period or at the end of the posting period. We set the target number of responses so  
114 that the sample size would be 50 or more for each applicable time period and exceed the minimum sample size (100 or  
115 more responses for analysis) required by the analysis software used in this study: IBM SPSS Amos version 2 and IBM  
116 SPSS Statistics version 22 [16,17]. Participants were provided with an electronic informed consent at the time of their  
117 participation in the survey and were informed beforehand that they could leave the survey at any time. Consent was  
118 obtained with the submission of the participant’s survey responses. Participants who responded to the survey received  
119 55 Japanese yen (approximately 0.5 US dollars) per each submission through the online service. Responses were  
120 collected between June 29, 2023 and July 5, 2023.

## 121 **Measures**

### 122 **Sociodemographic variables**

123 Respondents were asked to answer open-ended questions about gender and age, and this was followed by multiple  
124 choice questions about the respondent’s attributes. Here, we asked questions that were the same as Donath [8] and that  
125 focused on the children’s age group, the number of children, the age of the mother at the time of giving birth, whether  
126 they are also a grandmother or not, nationality, religion, highest level of education attained, employment status, marital  
127 status, whether they are a single parent, and gender identity. Then, respondents were asked to answer an open-ended  
128 question about family composition (their children’s gender and birth order). These items were used to examine the  
129 influence of a mother’s attribute on the degree of regret. Hence, to quantify each attribute item, we assigned numerical

130 values to each multiple-choice item in the order in which they were presented. For example, in the question about the  
131 “child’s age group,” a higher number indicates that the respondent is a mother to a child in a higher age group. For most  
132 or most items, we provided the answer option of “other” and assigned the value “0” to it. However, even if the answer is  
133 “Other,” there are cases in which “0” is not assigned. In addition, to quantify the “employment status” item, we based  
134 the scale on the degree of involvement in out-of-the-house labor and assigned a score of 1 to “housemaker,” 2 to  
135 “seasonal part-time staff,” 3 to “student,” 4 to “contracted labor (fixed-term) ,” and “Temporary employment,” 5 to  
136 “self-employed,” 6 to “long-term part-time employee,” and 7 to “full-time employee.” Occupations to which the  
137 participant did not fall (e.g., internships) were not assigned a numerical value. All participants in the present survey  
138 were Japanese nationals. Please refer to the support file for the scoring of these questions and variables ([S1 Data](#)).

### 139 **Measurement of the degree of regret of becoming a mother**

140 This is a scale item developed for this study. First, we referenced the interview conducted by Donath [8] and the  
141 narrative about the feeling of regret experienced by people who regret becoming a mother to select the language for the  
142 scale items. Then, we referenced Ueichi’s [18] Japanese translation of Washburn’s regret scale that measures regret  
143 proneness in daily life to select and revise the items’ language so that they reflected the feeling of regret as a mother.  
144 We revised and edited these with the help of two researchers and faculty who are certified public psychologists and  
145 clinical psychologists, obtaining 23 items. This regret of becoming a mother scale is answered on a 5-point Likert-type  
146 scale (*strongly disagree* = 1 to *strongly agree* = 5); the higher the score, the stronger the feeling of regret ([S1 File](#)).

### 147 **Screening of participants who regret becoming mothers**

148 This was the item used in Donath’s [8] interview study to select participants who regretted becoming mothers. In the  
149 present study, we used this for the validity test and to define the cut-off value. Below, we explain the screening and



150 statistical procedures. Donath [7,8] used a two-step procedure for screening. As the first step in the present study, this  
151 consisted of a maximum of four items; however, it first required a response to the following three questions: (1) do you  
152 regret becoming a mother? (2) if you could go back in time and had the knowledge and experience you have today,  
153 would you still choose to become a mother (reverse scoring)? (3) in your opinion, does being a mother have any  
154 advantages (reverse scoring)? These were all dichotomous questions that were answered with a “Yes” or “No.”  
155 As the second step, those who answered “Yes” to item (3) above, that is, those who responded that “being a mother has  
156 advantages” were asked to answer an additional item: (4) in your opinion, do the advantages outweigh the  
157 disadvantages (reverse scoring)? This was also a dichotomous question answered with a “Yes” or “No.” Based on the  
158 responses to these screening items (responses to up to four items), participants were selected if they indicated “regret”  
159 in their responses in three or more items. In the present study, we quantified “Yes” answers with a score of 2 and “No”  
160 answers with a score of 1 and then processed the reverse scoring items. Next, following Donath’s [8] screening criteria,  
161 statistical processing was performed so that a score of seven or above would identify the respondent as eligible for  
162 participation. Respondents who had already passed the screening based on their answers to three items out of the four  
163 were not directed to the fourth question. In this case, their answers were processed as indicating “regret” and quantified  
164 accordingly to be reflected in their score.

## 165 **Measurement of regret propensity**

166 We used Ueichi’s [18,19] Japanese translation of Washburn’s regret scale. This scale was designed with the purpose of  
167 measuring the extent to which one tends to experience regret [19]. It comprised one factor and 20 items that asked about  
168 the degree of regret in daily life situations on a 5-point Likert-type scale (*disagree* = 1 to *agree* = 5); the higher the

169 score, the higher the propensity to experience regret. In this study, we used this for validity check and assumed that the  
170 score of this item showed a positive correlation with the degree of regret of becoming a mother.

### 171 **Measurement of parenting happiness**

172 We used the short version of the Parenting Happiness Scale designed by Shimizu et al. [20], which measures the degree  
173 of happiness gained from parenting among mothers of infant children. This scale comprised 13 items and three factors:  
174 five items relating to the “joy in parenting” factor that measures the overall joy a mother experiences in day-to-day  
175 parenting, four items relating to the “bond with children” factor that measures the feeling of relief a mother experiences  
176 from the realization that the mother–child relationship is unshakable through events that occur between the child and  
177 mother themselves or others, and four items relating to the “gratitude towards the husband” factor that measures  
178 gratitude for the help with childcare obtained from the husband and others. Items about the happiness a mother  
179 experiences in parenting were answered on a 5-point Likert-type scale (*disagree* = 1 to *agree* = 5); a higher score  
180 indicated a higher level of happiness in parenting. In the present study, we used the total score of the three factors to  
181 check for validity and assumed that the score of this scale showed a negative correlation with the degree of regret of  
182 becoming a mother.

### 183 **Item to check the accuracy of recalled memory**

184 We used the parenting happiness scale short form designed by Shimizu et al. [20], which was developed specifically for  
185 mothers of infant children. Therefore, participants whose children were aged 15 or older were instructed as follows to  
186 check the accuracy of recalled memory. Specifically, the instruction message was “The previous questions included  
187 items related the care of infants and young children, so please tell us how well you were able to recall those times” and  
188 asked the respondent to answer on a 10-point Likert-type scale (*I could not recall at all* = 1 to *I could recall well* = 10).

189 Respondents who had a score of five or less in this check item were deemed as not having provided a valid response to  
190 Shimizu et al.'s [20] scale and were excluded from the analysis.

## 191 **Measurement of views on motherhood**

192 We used Hanazawa's [21] Motherhood Concept Questionnaire, which asks about the ideals and values of and attitudes  
193 toward motherhood. It comprises 27 items, including items that affirm motherhood (18 items), such as "Child-rearing is  
194 a job that suits women well, so it is natural for women to do so" and "If you do not bear and raise a child, there is no  
195 worth in being born a woman." It also contains items that reject motherhood (9 items), such as "It is better to not have  
196 children to enjoy married life" and "It is wrong for mothers to make child-rearing their main reason for living."  
197 Respondents were asked to answer their views on motherhood on a 5-point Likert-type scale (*strongly disagree* = 1 to  
198 *strongly agree* = 5). For statistical processing, following Hanazawa [21,22], we reverse scored the reject items (9 items)  
199 for quantification; thus, a higher score indicated a more positive view toward being a mother. We used this for validity  
200 check and assumed that the score of this item has a negative correlation with the degree of regret of becoming a mother.

## 201 **Identifying bad respondents**

202 We used the Instructional Manipulation Check (IMC) designed by Masuda et al. [15], which is a questionnaire designed  
203 to screen bad respondents who answer online surveys on the Internet without reading the instructions. The instruction  
204 read, "In online surveys on the Internet, there is a problem of respondents who provide false answers or without reading  
205 the questions. Therefore, we apologize for the inconvenience but allow us to verify if you have read this message. To  
206 confirm that you have read and understood this message, please proceed without answering the following question (do  
207 not select any option)." The respondent was asked to click "Next" without answering the question.

## 208 **Ethical consideration**

209 Consent to the survey and confirmation of consent was done by responding to an online form (Google Form). After  
210 explaining the purpose of the study in the first section of the survey, participants were informed that participation was  
211 voluntary, that the survey was anonymous, and that personal information would not be disclosed to any third parties.  
212 The survey form was designed so that only participants who agreed to these informed consents could participate in the  
213 study. thus, consent for participation was considered obtained from respondents once they had completed and submitted  
214 their answers. Response records are designed so that individuals cannot be identified for any reason. However, it is  
215 possible to print only the record of consent to the research if necessary. This study was approved by the Tohoku  
216 University Graduate School of Education's ethics committee (Approval 23-1-006).

## 217 **Data analysis**

218 The analysis was performed using the statistical software IBM SPSS AMOS version 22 and IBM SPSS Statistics  
219 version 22. First, we conducted a factor analysis of the motherhood regret scale and a correlation analysis to examine its  
220 reliability and validity. Next, we defined the cut-off value to apply to the motherhood regret scale using the index of the  
221 completed scale and the index of Donath's [8] screening items. Finally, we performed a multiple regression analysis to  
222 examine the effect of the participants' attributes on the degree of regret of becoming a mother.

223 Below, we explain the factor analysis. This scale was assumed to represent one factor. Thus, we conducted a single  
224 factor confirmatory factor analysis (CFA) to select the items. Here, we used oblique rotation and maximum likelihood  
225 extraction. To verify the goodness-of-fit, we analyzed the goodness-of-fit index (GFI), the adjusted goodness-of-fit  
226 index (AGFI), the comparative fitting index (CFI), and the root-mean-square approximation error (RMSEA). The cut-

227 off values for acceptable model fit used in this study are as follows: GFI > .90 as acceptable fit, > .95 as good fit, AGFI  
228 > .90 as acceptable fit, > .95 as good fit, CFI > .90 as acceptable fit, > .95 as good fit, RMSEA < .10 as acceptable fit,  
229 and < .06 as good fit. In the case of insufficient goodness-of-fit, it was assumed that the error correlation was related to  
230 the modification index (MI), which indicates the expected change in parameters when a particular specification is  
231 included in the model. In other words, in this study, we interpreted that in a model that measures a single concept, when  
232 a model specification that causes a high correlation between items occurs, this is reflected in the value of MI. Therefore,  
233 when the degree of fit was insufficient, the analysis was performed based on the MI.

234 Next, to assess reliability, we calculated the Cronbach's Alpha Coefficient ( $\alpha$ ). We followed Oshio's [23] standards and  
235 defined an alpha coefficient of  $\alpha > .70$  as acceptable internal consistency reliability and  $\alpha > .80$  as a high internal  
236 consistency reliability.

237 To assess validity, we calculated Pearson's correlation coefficient between the motherhood regret scale parameters and  
238 the parameters of other scales. We followed the standards set by Cohen [24] to assess validity and interpreted a  
239 coefficient of  $r = \pm .50$  as strong,  $r = \pm .30$  as medium, and  $r = \pm .10$  as weak.

240 Then, we considered the cut-off value to apply in the scale being developed here. We calculated the average score of the  
241 motherhood regret scale of screened participants in Donath's [8] study. We expected a difference between the  
242 proportions of screened regretful participants in Donath's [8] study and those of the participants who met the cut-off  
243 value set for the present scale. Thus, instead of using the minimum score in our motherhood regret scale of Donath's  
244 screened participants, we decided to calculate their average score and use this as the feasible cut-off value. Moreover,  
245 the NHK study reported that around 30% of mothers had experienced regret [9]; therefore, we considered the proportion  
246 of mothers who met the cut-off value for each motherhood stage group.

247 Finally, to examine the effect of the participant’s attributes on the degree of regret of becoming a mother, we performed  
 248 multiple regression analysis, in which each attribute item was an independent variable and the degree of regret for  
 249 becoming a mother was the dependent variable. The stepwise method was adopted as the analysis method because it has  
 250 the characteristic of specifying only the independent variables that show a significant explanation rate for the dependent  
 251 variable from among many variables. We assessed multicollinearity following Koshio [23] and confirmed that the  
 252 variance inflation factor (VIF) was less than 10.

253

## 254 Results

### 255 Transforming variables into scores and assessing reliability and 256 validity

257 Table 1 shows the correlation between the basic statistics for each variable measured and the scale.

| Table 1. Correlation between the Regreting motherhood scale and Other variables |            |             |          |          |                            |
|---------------------------------------------------------------------------------|------------|-------------|----------|----------|----------------------------|
|                                                                                 | Mean (SD)  | Min - max   | Skewness | Kurtosis | Regreting motherhood scale |
| Regreting motherhood scale ( $\alpha=.96$ )                                     | 1.62 (.87) | 1.00 - 4.89 | 1.55     | 1.65     | -                          |
| Donath's screening point ( $\alpha=.74$ )                                       | 1.12 (.24) | 1.00 - 2.00 | 2.09     | 3.80     | .55**                      |
| Tendency to regret ( $\alpha=.78$ )                                             | 3.02 (.50) | 1.40 - 4.60 | -.04     | .20      | .30**                      |
| Childcare happiness ( $\alpha=.92$ )                                            | 4.18 (.73) | 1.23 - 5.00 | -1.17    | 1.32     | -.60**                     |
| Motherhood vision ( $\alpha=.90$ )                                              | 3.09 (.49) | 1.11 - 4.26 | -.54     | 1.16     | -.53**                     |

Notes:\*\* $p < .01$ ;  $\alpha$ , Cronbach's alpha.

258

### 259 Degree of regret of becoming a mother

260 This is a scale item created for this study. Based on the confirmatory factor analysis and validity test, this scale  
 261 comprises one factor and nine items. Cronbach’s  $\alpha$  was calculated to assess reliability, and an  $\alpha$  coefficient of .96  
 262 indicates high reliability as it sufficiently meets the criteria of  $\alpha > .80$  of high internal consistency reliability.

### 263 Screening items for those who regret becoming mothers

264 This corresponds to the four items used in Donath’s [8] study to select mothers who experienced feelings of regret at the  
 265 time of the interview. These were all “Yes” or “No” dichotomous questions and given a score of Yes = 2 and No = 1.

266 The  $\alpha$  for the total score was .74, which met the  $\alpha > .70$  criteria for acceptable internal consistency, and the reliability of  
267 the scale was confirmed. We used this to assess the validity of the motherhood regret scale.

## 268 **Regret propensity**

269 This is a 20-item scale that measures the propensity of experiencing regret in daily life. The  $\alpha$  for the total score was  
270 .78, which met the  $\alpha > .70$  criteria for acceptable internal consistency, and the reliability of the scale was confirmed. We  
271 used this to assess its validity.

## 272 **Parenting happiness**

273 It is a 13-item scale that measures the degree of happiness that a mother experiences through parenting. The  $\alpha$  for the  
274 total score was .92, which met the  $\alpha > .80$  criteria of sufficient internal consistency, and high reliability was confirmed.  
275 We used this to assess the validity of the motherhood regret scale.

## 276 **View of motherhood**

277 It is a 27-item scale that measures the ideals and values of and attitudes toward motherhood through positive and  
278 negative views of it. The  $\alpha$  for the total score was .90, which met the  $\alpha > .80$  criteria of sufficient internal consistency,  
279 and high reliability was confirmed. We used this to assess the validity of the motherhood regret scale.

## 280 **Validity assessment**

281 We calculated the totals of the regret scale score, Donath's [8] screening items score, regret propensity score, parenting  
282 happiness score, and view of motherhood score and calculated the correlation coefficients for each. The results show a  
283 significant correlation at the 1% level between each of the variables (Table 1). Specifically, the results showed a  
284 significant positive correlation between the degree of regret of becoming a mother and the screening item score ( $r = .55$ ,  
285  $p < .01$ ) and a positive correlation between the degree of regret of becoming a mother and regret propensity ( $r = .30$ ,  $p <$   
286  $.01$ ). Furthermore, the degree of regret of becoming a mother had a significant negative correlation with parenting

287 happiness ( $r = -.60, p < .01$ ) and a negative correlation with view on motherhood ( $r = -.53, p < .01$ ); thus, the  
288 motherhood regret scale was found to show sufficient validity.

## 289 **Factor structure of the motherhood regret scale**

290 We performed a one factor confirmatory factor analysis of the original 23-item motherhood regret scale. Table 2 shows  
291 the model fit comparison (original 23 items; Table 2, Model 1). In the process of repeating factor analysis, we excluded  
292 the items for which the factor loading did not reach .80. In addition, we hypothesized the relationships between items as  
293 follows: a positive correlation between item 7 (“I feel being a mother is unbearable”) and item 8 (“if I could, I would  
294 like to quit being a mother”), a negative correlation between item 9 (“I believe that I will never be happy as a mother”) and  
295 item 16 (“I sacrificed myself to become a mother and this left a scar on me”), and a negative correlation between  
296 item 10 (“I believe a life in which I do not become a mother would had been better”) and item 19 (“Becoming a mother  
297 was an event that will continue to hurt me throughout my life”). Thus, by drawing a pass based on the modification  
298 index, we were able to attain an acceptable degree of goodness-of-fit, and an acceptable degree of consistency was  
299 confirmed ( $\chi^2 = 111.69, p < .001, GFI = .95, AGFI = .91, CFI = .98, RMSEA = .09$  [90% CI = .07–.11]). Table 2 shows  
300 the results of the final factory analysis (9 items after selection; Table 2, Model 2), and Fig 1 shows the model with the  
301 acceptable degree of fit.



| Items                                                                                                                                                                                      |                                                                                   | Standardized loadings |           |
|--------------------------------------------------------------------------------------------------------------------------------------------------------------------------------------------|-----------------------------------------------------------------------------------|-----------------------|-----------|
|                                                                                                                                                                                            |                                                                                   | Model 1               | Model 2   |
| <b>Regreting motherhood scale (<math>\alpha=.96</math>)</b>                                                                                                                                |                                                                                   |                       |           |
| 1                                                                                                                                                                                          | Think how much better my life would have been if I had chosen not to be a mother. | .72                   | –         |
| 2                                                                                                                                                                                          | I think I should have been more careful about whether or not to become a mother.  | .72                   | –         |
| 3                                                                                                                                                                                          | I think it is unfortunate to be a mother.                                         | .78                   | –         |
| 4                                                                                                                                                                                          | I think I became a mother to meet the expectations of society and others.         | .63                   | –         |
| 5                                                                                                                                                                                          | I believe that it was never my intention to become a mother.                      | .74                   | –         |
| 6                                                                                                                                                                                          | I think I should never have become a mother.                                      | .80                   | –         |
| 7                                                                                                                                                                                          | I feel that being a mother is unbearable.                                         | .86                   | .83       |
| 8                                                                                                                                                                                          | I would quit being a mother if I could.                                           | .87                   | .86       |
| 9                                                                                                                                                                                          | I don't think I will ever be happy as a mother.                                   | .81                   | .85       |
| 10                                                                                                                                                                                         | I would have preferred not to be a mother.                                        | .84                   | .84       |
| 11                                                                                                                                                                                         | I feel terrible when I look at my children.                                       | .73                   | –         |
| 12                                                                                                                                                                                         | When I look at my children, I don't think they are cute.                          | .78                   | –         |
| 13                                                                                                                                                                                         | I feel traumatized by motherhood.                                                 | .79                   | –         |
| 14                                                                                                                                                                                         | When I hear the words "women who don't want to have children," I think it is me.  | .83                   | .84       |
| 15                                                                                                                                                                                         | When I realize (or reconfirm) that I have become a mother, I feel hazy feeling.   | .87                   | .87       |
| 16                                                                                                                                                                                         | I feel as if motherhood has made sacrifices and left scars.                       | .82                   | .83       |
| 17                                                                                                                                                                                         | When I think of being a mother, I feel like I am in a place where I cannot leave. | .70                   | –         |
| 18                                                                                                                                                                                         | I feel trapped by motherhood.                                                     | .76                   | –         |
| 19                                                                                                                                                                                         | I feel that motherhood was an event that scarred me for life.                     | .82                   | .84       |
| 20                                                                                                                                                                                         | I feel oppressed by the world's expectations that I should love my children.      | .77                   | –         |
| 21                                                                                                                                                                                         | Feel that I do not like being a mother.                                           | .85                   | .84       |
| 22                                                                                                                                                                                         | Feel a great deal of frustration at being a mother.                               | .81                   | –         |
| 23                                                                                                                                                                                         | Feel forced to think that being a mother is a joyful thing.                       | .71                   | –         |
|                                                                                                                                                                                            | $\chi^2$                                                                          | 1926.29***            | 111.69*** |
|                                                                                                                                                                                            | df                                                                                | 230                   | 24        |
|                                                                                                                                                                                            | GFI                                                                               | .66                   | .95       |
|                                                                                                                                                                                            | AGFI                                                                              | .60                   | .91       |
|                                                                                                                                                                                            | CFI                                                                               | .84                   | .98       |
|                                                                                                                                                                                            | RMSEA                                                                             | .13                   | .09       |
|                                                                                                                                                                                            | 90 Percent C.I.                                                                   | .12-.13               | .07-.11   |
| Notes:*** $p < .001$ ;GFI,goodness-of-fit index;AGFI,adjusted goodness-of-fit index ;CFI,comparative fitting index;RMSEA,root-mean-square approximation error; $\alpha$ ,Cronbach's alpha. |                                                                                   |                       |           |

302

303 **Fig 1. This is the Fig 1 Title. Fig 1. Path diagram of the suitable model**

304 **Considerations for the cut-off value and proportion of participants**  
 305 **classified into the regret group**

306 **Cut-off value**

307 We calculated the average motherhood regret score of the screened participants from Donath's [8] study and used this  
 308 score as the cut-off value (Table 3). The average score of the screened participants ( $N = 26$ ) was 30.38, and we set the  
 309 cut-off value for our scale at 30. Therefore, we classified a score of 30 or higher out of a total possible score of 45 into  
 310 the regret group and a score of 29 or less into the non-regret group. In the current study, 31 of the 462 participants (7%,

311 *Range* = 26–53) had a score that falls under the regret category. In contrast, 13 of the 26 screened participants in  
312 Donath’s [8] study were classified into the regret group using our scale.

|                                      | Regreting motherhood scale | <i>N</i> (%) |
|--------------------------------------|----------------------------|--------------|
|                                      | Mean [ <i>Range</i> ]      |              |
| Donath's screening selector (SI:8点)  | 36 [28 - 44]               | 12 (3)       |
| Donath's screening selector (SI:7点)  | 26 [16 - 35]               | 14 (3)       |
| Donath's screening selector everyone | 30 [16 - 44]               | 31 (7)       |

Notes:SI,screening items.

## 313 314 **Participants classified into the regret group**

315 The proportion of participants identified as the regret group was 7% (*N* = 31, *Range* = 26–53) of the total sample. The  
316 breakdown (Top % of each stage, mother's age range) by motherhood stage is as follows. Among pregnant mothers,  
317 seven out of 64 (11%, *Range* = 27–42), 3 out of 55 mothers of infants (5%, *Range* = 30–36), 11 out of 131 mothers of  
318 young children (8%, *Range* = 26–42), 5 out of 133 mothers of elementary school age children ( 4%, *Range* = 35–41),  
319 and 5 out of 79 mothers of adolescents and young adults (6%, *Range* = 30–53) were classified into the regret group (Fig  
320 2).

321 **Fig 2. This is the Fig 2 Title. Fig 2. Proportion of mothers classified into the regret group by motherhood stage**  
322 **groups (%)**

## 323 **The influence of attributes on the regret of becoming a mother**

324 Table 4 shows the results of the multiple regression analysis (stepwise procedure) conducted to understand the  
325 participants’ attributes and the influence of such attributes on the degree of regret of becoming a mother. In the analysis,  
326 we defined the items for participants’ basic attributes as the independent variables and the degree of regret of becoming  
327 a mother as the dependent variable. The variance inflation factor was below 10 for all, and multicollinearity was not  
328 observed. The results showed that the attribute “having many children” had a significant negative correlation with the

- 329 estimated degree of regret of becoming a mother ( $\beta = -.19, p < .001$ ) and “being a single mother” had a significant
- 330 positive correlation with the estimated degree of regret of becoming a mother ( $\beta = .11, p < .05$ ).

Table 4. Results of multiple regression analysis using subject attributes and degree of regret over becoming a mother as dependent variables.

| Variable                                                                                                                                         | N = 462 | %      | B                         | β       |
|--------------------------------------------------------------------------------------------------------------------------------------------------|---------|--------|---------------------------|---------|
| <b>Sex</b>                                                                                                                                       |         |        |                           |         |
| Male, Others                                                                                                                                     | 4       | (1%)   |                           |         |
| Female                                                                                                                                           | 458     | (99%)  |                           |         |
| <b>Age</b>                                                                                                                                       |         |        |                           |         |
| ≤20s                                                                                                                                             | 0       | (0%)   |                           |         |
| 20s                                                                                                                                              | 46      | (10%)  |                           |         |
| 30s                                                                                                                                              | 229     | (50%)  |                           |         |
| 40s                                                                                                                                              | 162     | (35%)  |                           |         |
| 50s                                                                                                                                              | 25      | (5%)   |                           |         |
| <b>The children's age group</b>                                                                                                                  |         |        |                           |         |
| Pregnant (before birth)                                                                                                                          | 64      | (14%)  |                           |         |
| Infant (age 0–1)                                                                                                                                 | 55      | (12%)  |                           |         |
| Young children (age 2–6)                                                                                                                         | 131     | (28%)  |                           |         |
| Elementary school age children (age 7–12)                                                                                                        | 133     | (29%)  |                           |         |
| Adolescents and young adults (age 13–29)                                                                                                         | 79      | (17%)  |                           |         |
| The number of children                                                                                                                           |         |        | -1.72                     | -.19*** |
| 1 person                                                                                                                                         | 231     | (50%)  |                           |         |
| 2 person                                                                                                                                         | 165     | (36%)  |                           |         |
| 3 person                                                                                                                                         | 53      | (11%)  |                           |         |
| 4 or more person                                                                                                                                 | 13      | (3%)   |                           |         |
| <b>The age of the mother at the time of giving first birth</b>                                                                                   |         |        |                           |         |
| ≤20s                                                                                                                                             | 2       | (0%)   |                           |         |
| 20s                                                                                                                                              | 227     | (49%)  |                           |         |
| 30s                                                                                                                                              | 222     | (48%)  |                           |         |
| 40s                                                                                                                                              | 9       | (2%)   |                           |         |
| 50s                                                                                                                                              | 2       | (0%)   |                           |         |
| Grandmother                                                                                                                                      | 4       | (1%)   |                           |         |
| Nationality (Japan)                                                                                                                              | 460     | (100%) |                           |         |
| <b>Religion</b>                                                                                                                                  |         |        |                           |         |
| No religion                                                                                                                                      | 417     | (90%)  |                           |         |
| Belongs to a religion (Buddhism, Shinto, Soka Gakkai, Shinnyoen, Shingon Esoteric Buddhism, Shingon Buddhism, Jodo Shinshu, Catholicism, Christ) | 45      | (10%)  |                           |         |
| <b>Final education</b>                                                                                                                           |         |        |                           |         |
| Junior high school                                                                                                                               | 5       | (1%)   |                           |         |
| High school                                                                                                                                      | 82      | (18%)  |                           |         |
| Universities, Vocational, Junior colleges                                                                                                        | 355     | (77%)  |                           |         |
| Master's course                                                                                                                                  | 15      | (3%)   |                           |         |
| Doctor's course                                                                                                                                  | 3       | (1%)   |                           |         |
| Others                                                                                                                                           | 2       | (0%)   |                           |         |
| <b>Employment status</b>                                                                                                                         |         |        |                           |         |
| Housemaker (No outside work)                                                                                                                     | 183     | (40%)  |                           |         |
| Seasonal part-time staff                                                                                                                         | 91      | (20%)  |                           |         |
| Student                                                                                                                                          | 1       | (0%)   |                           |         |
| Contracted labor (fixed-term), Temporary employment                                                                                              | 19      | (4%)   |                           |         |
| Self-employed                                                                                                                                    | 23      | (5%)   |                           |         |
| Long-term part-time employee                                                                                                                     | 16      | (3%)   |                           |         |
| Full-time employee                                                                                                                               | 122     | (26%)  |                           |         |
| Others                                                                                                                                           | 7       | (2%)   |                           |         |
| Internship (Paid & unpaid)                                                                                                                       | 0       | (0%)   |                           |         |
| <b>Marital status</b>                                                                                                                            |         |        |                           |         |
| Married                                                                                                                                          | 437     | (95%)  |                           |         |
| Unmarried, Others                                                                                                                                | 25      | (5%)   |                           |         |
| Single mother                                                                                                                                    | 22      | (5%)   | 3.69                      | .11*    |
| Gender identity (Female)                                                                                                                         | 448     | (97%)  |                           |         |
|                                                                                                                                                  |         |        | <i>adj R</i> <sup>2</sup> | .039    |

\**p* < .05, \*\**p* < .01, \*\*\**p* < .001

## 332 Discussion

### 333 Designing a scale

334 The primary objective of this study was to develop a scale that measures the degree of regret of becoming a mother  
335 among women at various stages of motherhood (child age ranging from unborn to 29 years old) and examine its  
336 reliability and validity. Below, we discuss the factor structure, reliability and validity of the scale, and cut-off value  
337 applied, as well as the characteristics of the item components. For the instrument's structure, we expected the scale to  
338 be unidimensional and thus used a one factor confirmatory factor analysis. After the analysis, the original 23 items were  
339 refined into 9, and the model showed acceptable fit indices and high reliability. As for validity, we confirmed sufficient  
340 validity by verifying that the regret of becoming a mother scale had significant correlations with each scale as  
341 hypothesized. Specifically, the results showed that a high degree of regret of becoming a mother is associated with high  
342 propensity to experience regret in general in daily life, low happiness from parenting, and low levels of positive views  
343 of motherhood. Therefore, it is presumed that those who regret becoming a mother tend to be more likely to experience  
344 regret in other aspects of daily life other than motherhood and cannot have positive feelings about parenting and their  
345 role as mothers.

346 Next, we explain the cut-off point of the scores. A widely used method to determine the cut-off point is the receiver  
347 operating characteristic (ROC) curve analysis, which draws an ROC curve based on the reference value of the scale for  
348 which the cut-off point is being determined (the scale being tested) and for other equivalent scales (the test scale). Then,  
349 for observations that exceed the reference value in the test scale, the minimum value in the scale being tested is  
350 calculated, and this is used as the discrimination threshold. On this point, it was expected that the variation in the scores

351 of Donath's [8] screening items would be large since it is not a statistically tested accurate scale. Hence, it was hard to  
352 assume that the scores would be appropriate to set a cut-off value for our scale; in fact, the range of scores for the  
353 present scale among Donath's [8] screened participants were wide ranging, from a minimum score of 16 out of 45 and a  
354 maximum of 44 out of 45. Therefore, in the present study, we calculated the average score of Donath's [8] screened  
355 participants and used this to set a cut-off value of 30. Participants who scored above this threshold represented 7% of  
356 the total sample, which concurs with the proportion of people that reported regret (7%) in NHK's [9] report. Thus, it  
357 was concluded that we had reached a reasonable cut-off value. In summary, we developed a scale that is  
358 unidimensional, with nine items answered on a 5-point Likert-type scale, and with a cut-off value score (30 out of 45) to  
359 categorize the regret group.

360 In terms of item content, we were able to design an item asking about the "regret of becoming a mother" that does not  
361 depend on the children's age-specific events; therefore, we addressed the issue of skewed participant characteristics in  
362 previous studies. The commonality among the items created allows to group them into "pressure of being a mother"  
363 (items 7 and 8), "despair and hopelessness in being a mother" (items 9, 16, 12), and "negative emotions when  
364 objectively recognizing the fact of being a mother" (items 10, 14, 15, 19). We suspect that such feelings are related to  
365 the desire to escape from compliance with the socially expected role as a mother and a negative sense toward  
366 motherhood itself. On the other hand, reflecting on the process that common item groups such as "negative feeling  
367 towards the decision of becoming a mother" (item 1, 2, 4, 5, 6, 13) and "not being able to love my child" (item 11, 12,  
368 20) resulted in being excluded, we suggest that the respondents held a negative view of themselves as mothers, but their  
369 regret of the decision in the past is resolved, and the regret they hold is not associated with lack of love toward the child.

## **The influence of basic attributes on the degree of regret**

A second objective of the study was to investigate the effects of participants' basic attributes on the regret of becoming a mother. Results of multiple regression analysis with each attribute item as the independent variable and the degree of regret of becoming a mother as the dependent variable showed that "having a large number of children" was a significant negative predictor of the mother's degree of regret, and "being a single mother" was a significant positive predictor of the mother's degree of regret. Therefore, the greater the number of children, the lower the mother's degree of regret, and being a single mother is associated with a higher degree of motherhood regret.

Based on the above result that a greater number of children is associated with a lower degree of regret, it can be argued that when a mother experiences less regret, she is more likely to decide to have another child. From this perspective, it is suggested that another factor leads to the absence of regret against the reality of being a mother. On the other hand, studies in Japan with child-rearing mothers report that as the number of children increases a mother's concern for not spending enough time with her children and being left with less time for herself [25]. At first glance, such reports suggest that a mother's regret will be higher due to the large number of children; however, the insights from the present study suggest that children bring some sort of positive effect, and overall, an association exists a greater number of children and a low degree of mother's regret. Here, considering studies that focus on the mothers' positive emotions, it is documented that one of the factors increasing parents' sense of happiness in parenting is when they feel their own growth as a parent or their children's growth [13]. Thus, it can be inferred that as the number of children increases, the opportunities to experience growth as a parent and joy from the process of parenting also increase, in turn leading to a

388 lower degree of regret. In the future, it will be meaningful to investigate what child-related factors are associated with a  
389 low degree of mother's regret.

390 The results showing the association of being a single mother with a high degree of regret may be an indicator of the  
391 harsh reality of a life as a single mother [26]. Nakasono [27] points out that 80% of single mothers are employed, but at  
392 the same time, 50% live in poverty, and they are in a condition of being "working poor." Relatedly, Matsumura et al.  
393 [10] suggest that the fact that mothers have less time to spend on themselves affects parenting stress and leads to an  
394 increase in the burden of child-rearing. In this way, the present situation in which mothers spend most of their time in  
395 the labor force, caring for the household, and attending to children has not changed much even after the pandemic and  
396 its social effects [26-28]. Moreover, spouse participation in parenting increases mothers' sense of happiness and  
397 decreases the burden from child-rearing [2,29]. Furthermore, mothers who build close relationships through  
398 interpersonal interactions in the local community experience parenting as fun and thus a lower sense of burden, in  
399 addition to showing satisfaction in their daily lives [25]. In summary, the reality is that single mothers have most of  
400 their time taken by work, parenting, and other responsibilities as mothers; they have little time for themselves and are  
401 missing the opportunity to participate in local community social spaces. Such a reality, in addition to not having the  
402 support of a spouse, seems to be associated with high degrees of regret.

### 403 **Participants classified into the regret group**

404 Below, we consider the participants who were classified into the regret group and their motherhood stages. Among the  
405 respondents classified into the regret group in the present scale ( $N = 31$ ), of those who passed Donath's [8] screening ( $N$   
406 = 26), the majority ( $N = 13$ ) scored below the cut-off value of 30 and were excluded from the regret group. In addition,



407 the NHK [9] report indicated that one in three (30%) mothers regretted becoming mothers, but our results show that the  
408 proportion was 1 in 14 (7%); these differences could be explained by different methods of measurement. NHK's [9]  
409 report asked participants whether regret had been "experienced at least once in the past," while our study asked about  
410 "mother's regret recognized in the present." Thus, many have had regrets for becoming mothers in the past, but not  
411 many mothers currently regret this. In other words, even if a mother had once felt regret, she acquired the means to  
412 adapt to this regret over time and the skills to escape from regret and strive for the role of mother.

413 In addition, when examining the data by motherhood stage groups, the proportion of mothers belonging to the regret  
414 group ( $N = 31$ ) was the highest. The proportion decreased among mothers of infants and increased among mothers of  
415 young children; subsequently, the proportion decreased among mothers of elementary school age children and increased  
416 among mothers of adolescents and young adults. According to such trend, mothers' regret increases between children's  
417 transition from infancy to early childhood and between elementary school age to adolescence/adulthood. What this  
418 pattern shows is correspondence with the rebellious phases observed along the developmental stages of a child. In the  
419 present study, early childhood is the first rebellious period, and adolescence/adulthood the second; these are periods  
420 when a mother experiences changes in her sense of control in parenting. Studies examining sense of control among  
421 mothers of infants have reported that children's unreasonable behavior is a factor that leads to parenting stress in  
422 mothers [11] and that the sense of inability to control the children is an element that explains parenting stress in mothers  
423 [12]. Therefore, it is suggested that changes in regret are related to a mother's own sense of control; in fact, during  
424 pregnancy, the mother cannot control her own body in the same way she used to before the pregnancy due to the  
425 changes in her body. When a child transitions from infancy to early childhood, they start moving around at their own  
426 will and verbally expressing their will, making it hard to control their behavior.

427 Next, in the transition from childhood to adolescence/adulthood, the child becomes more independent psychologically,  
428 and the relationship with the mother also changes. Therefore, a mother may experience regret during periods when a  
429 change in the sense of control in respect to the mother's body, the child's behavior, and the psychological realm occurs.  
430 However, since the present study is limited to the measurement of regret, we look forward to future studies examining  
431 the factors related to changes in regret.

## 432 **Limitations of the study**

433 This study has several limitations. First, we should consider the sample. Although data were collected from a wide  
434 range of people using the Internet, it is highly likely that the participants in our study had sufficient time to take part in  
435 the survey and were in an emotionally stable condition to answer about the regret of being a mother. Future studies  
436 should examine a wide range of factors related to living conditions, such as financial situation, weak ties to supportive  
437 networks for performing the role as a mother, and being a single mother, and investigate how these factors influence the  
438 regret of being a mother.

439 Next, only using the motherhood regret scale does not provide insights into the causes and factors related to regret. For  
440 instance, the reasons and factors related to regret may be different for mothers who show the same score but are in  
441 different stages of motherhood. In the future, it will be necessary to examine what factors constitute regret in each  
442 motherhood stage.

443 Last, although we discussed our thoughts about the proportion of the regret group by each motherhood stage, since we  
444 used cross-sectional data, it is not possible to examine how individuals progressed through the changes in regret. In the  
445 future, it is recommended to collect and examine data longitudinally through such methods as case studies.

446

## 447 **Conclusion**

448 As stated above, this study was able to explain the factor composition, reliability, and validity of the “Motherhood  
449 Regret Measurement Scale” despite its limitation. Moreover, it showed the relevance of the mother’s attribute on the  
450 degree of regret. Our study is the first in Japan to focus on motherhood regret from the perspective of clinical  
451 psychology and quantitatively demonstrate its relevance.

452 The body of research on family, parenting, and mothers’ mental health is growing. Against this backdrop, our study  
453 contributes to a greater understanding, acceptance, and support of the regret that many mothers face by making it  
454 possible to quantitatively measure its degree within a sociocultural context where support is often overlooked.

455

## 456 **Supporting information**

457 S1 File. Motherhood regret scale.

458 ([PDF](#))

459 S1 Data. Anonymized data set.

460 ([CSV](#))

461

## 462 **Acknowledgements**

463 We would like to thank everyone who cooperated in the study and composition of this paper.

464

## References

1. Cabinet Office of Japan. White Paper on Society of Declining Birthrate; 2023 [cited 2023 Dec 4]. Available from: [https://www5.cao.go.jp/keizai-shimon/kaigi/special/future/sentaku/s3\\_1\\_2.html](https://www5.cao.go.jp/keizai-shimon/kaigi/special/future/sentaku/s3_1_2.html).
2. Wakashima K, Sunaga N, Noguchi S. A proposal to the problem resolution of population declining society: From the research team in steering committee for 24th Annual Conference. *Annual Progress of Family Psychology*. 2008;26: 193-205.
3. Nishioka Y. Family crisis formation in cases of filicide-suicide by mothers as the perpetrators. *JSSSW*. 2019;60(1): 17-32.
4. Ogata K. Profiling child maltreatment perpetrators based on Japanese statistics. *Bulletin of Osaka Ohtani University*. 2022;56: 77-90.
5. Sato M, Kokaji M, Hayashi A, Inake E. A study on factors associated with maternal mental health: Longitudinal analysis of the records at the registration of pregnancy and the postnatal home visit. *Bulletin of Fukushima Medical University School of Nursing*. 2008;10: 31-46.
6. Tsuge Y, Igarashi T. Association between gender role attitudes toward the division of labor among couples raising 18-month-old children and the mental health status of mothers. *Bulletin of Nara Medical University School of Nursing*. 2019;15: 33-42.
7. Donath O. *Hahaoya ni natte kokai shiteiru [Regretting Motherhood]*. Shinchosha; 2022.
8. Donath O. Regretting motherhood: A sociopolitical analysis. *Signs: Journal of Women in Culture and Society* 2015;40: 2.

- 484 9. NHK. “Do You Wish You Hadn’t Become a Mother?” Results of a Survey of 6,000 Women with Mixed Feelings.  
485 NHK Minnade Plus; 2022. [cited 2023 Dec 4]. Available from:  
486 <https://www.nhk.or.jp/minplus/0029/topic099.html>.
- 487 10. Matsumura K, Uemura Y, Miura H, Ogawa K, Funayoshi K, Reiko S. Study concerning mothers’ stress relating to  
488 childcare. Bulletin of Kagawa Prefectural College of Health Sciences. 2005;2: 19-28.
- 489 11. Noguchi J, Ogawa K, Matsumura K. Distress and childcare stress among mothers rearing infants: Compared with  
490 day nursery and kindergarten. Bulletin of Kagawa Prefectural College of Health Sciences; 2006; 2: 79-86.
- 491 12. Shimizu Y, Nishida K. A Study on the structure of ChildCare stress. JINR. 2000; 23(5): 55-67.
- 492 13. Shimizu Y, Ise K. A study on the reality of child care happiness and child care event in mothers. Bosei Eisei.  
493 2006;47(2): 344-351.
- 494 14. Yamazaki S, Shinohara R, Akiyama Y, Ichikawa K, Ojima T, Tamakoshi K, Matsuura K, Yamazaki Y, Yamagata  
495 Z. The relationship between parenting anxiety in mothers and the resources from which they routinely sought  
496 advice: The final “Healthy Parents and Children 21” survey. Japanese Journal of Public Health. 2018;65(7): 334-  
497 346.
- 498 15. Masuda S, Sakagami T, Morii M. Comparison among methods for improving response quality of surveys. J Jpn  
499 Psychol. 2019;90(5): 463-472.
- 500 16. Kline R. Principles and practice of structural equation modeling (methodology in the social sciences). 3rd ed. New  
501 York: Guilford Press; 2011.
- 502 17. Wolf EJ, Harrington KM, Clark SL, Miller MW. Sample size requirements for structural equation models: An  
503 evaluation of power, bias, and solution propriety. Educ Psychol Meas. 2013;73(6): 913-34.

- 504 18. Ueichi H. The psychology of putting regret to good use: Decision making and coping methods that lead to growth  
505 and success. Tokyo: Chuokoron-Shinsha; 2022.
- 506 19. Ueichi H. Japanese translation of Washburn's Regret Scale. In: Ueichi H. The psychology of putting regret to  
507 good use: Decision making and coping methods that lead to growth and success. Tokyo: Chuokoron-Shinsha;  
508 2022. p. 247.
- 509 20. Shimizu Y, Sekimizu S, Endo T. Development of a short-form of childcare happiness scale. JJAM. 2010;24(2):  
510 261-270.
- 511 21. Hanazawa S. A method for measuring maternal consciousness. In: Hanazawa S. Maternal psychology. Tokyo:  
512 Igaku-Shoin; 1992. p.14-17 .
- 513 22. Hanazawa S. Developing maternal consciousness. In: Hanazawa S. Maternal psychology. Igaku-Shoin; 1992.  
514 p.29-34.
- 515 23. Oshio A. Psychological and survey data analysis using SPSS and AMOS. 2nd ed. Tokyo: Tosho; 2004.
- 516 24. Cohen J. Statistical power analysis for the behavioral sciences. 2nd ed. Hillsdale NJ: Lawrence Erlbaum  
517 Associates; 1998.
- 518 25. Ministry of Health, Labour and Welfare of Japan. Factor analysis of mothers' feelings of burden and anxiety in  
519 raising children; 2003 [cited 2023 Dec 12]. Available from: [https://www.mhlw.go.jp/houdou/2003/05/dl/h0502-  
520 1c7.pdf](https://www.mhlw.go.jp/houdou/2003/05/dl/h0502-1c7.pdf).
- 521 26. Brown GW, Moran PM. Single mothers, poverty and depression. Psychol Med. 1997;27(1): 21-33.
- 522 27. Nakazono K. Why poverty among single mothers persists. Tokyo: Keiso Shobo; 2021.

523 28. Del Boca D, Oggero N, Profeta P, Rossi M. Women's and men's work, housework and childcare, before and  
524 during COVID-19. *Rev Econ Househ.* 2020;18: 1001-1017.

525 29. Matsuda H. Childcare networks and the well-being of mothers. *JSR.* 2001;52(1): 33-49.

526

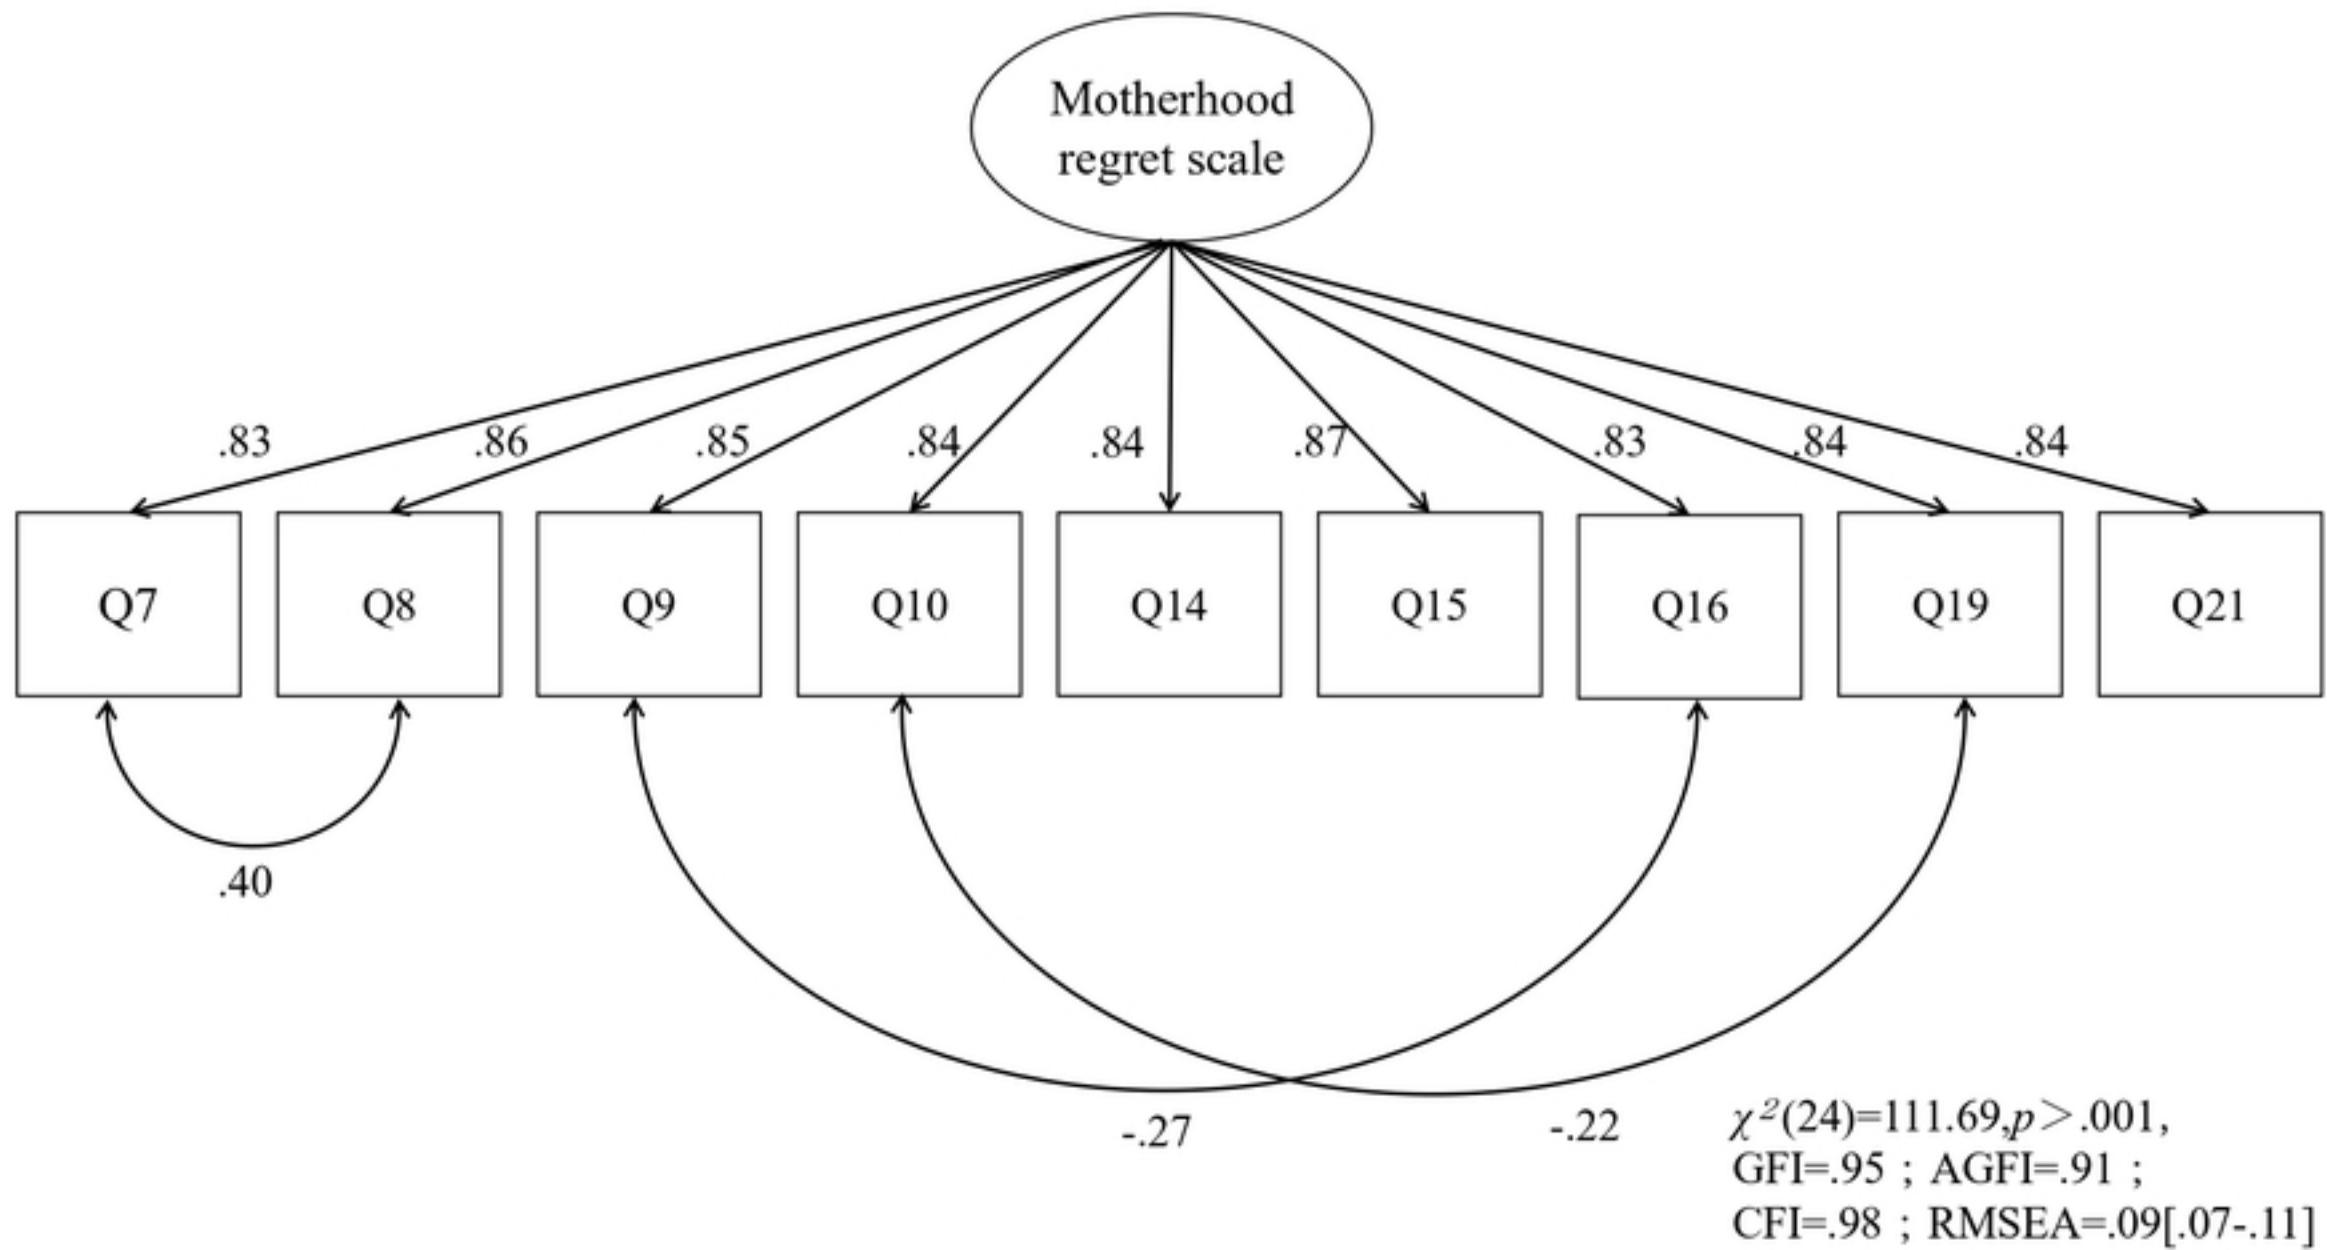



11

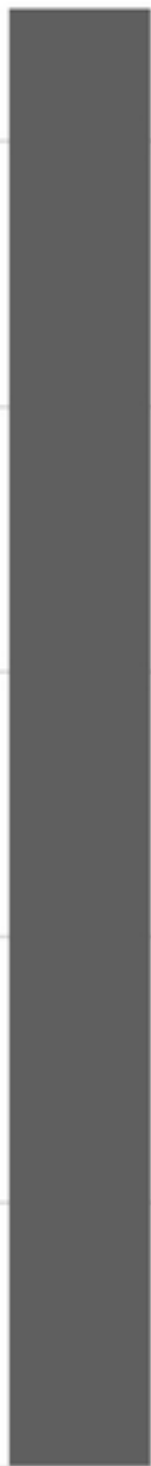

pregnant  
(before birth)

5

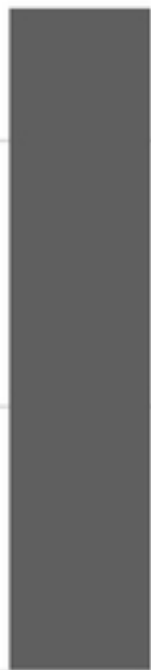

infants

8

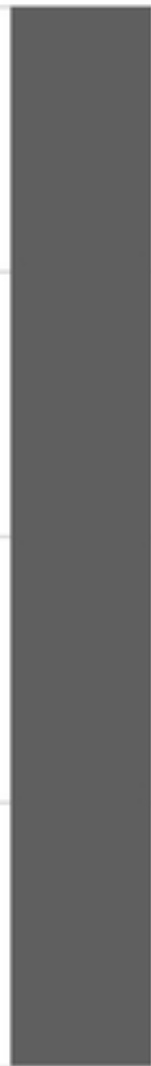

young  
children

4

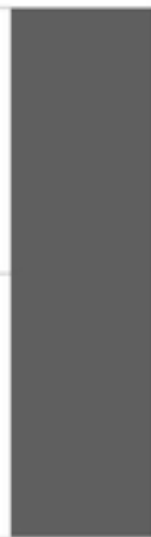

primary school-aged  
children

6

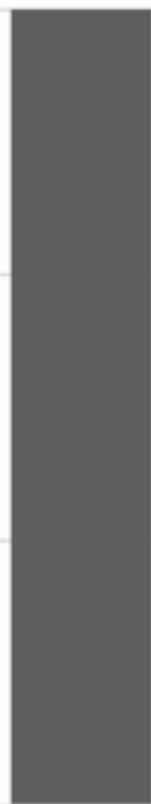

adolescents and young  
adults

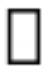

Source: https://medrxiv.org/content/10.1101/2024.03.13.24304242.full.pdf
